# THE EFFECTS OF HYPERCAPNIA ON FORCE AND RATE OF CONTRACTION AND INTRACELLULAR pH OF PERFUSED VENTRICLES FROM THE LAND SNAIL *HELIX LUCORUM* (L.)

BASILE MICHAELIDIS<sup>1,\*</sup>, EVANGELIA ROFALIKOU<sup>1</sup> AND MANFRED K. GRIESHABER<sup>2</sup>

<sup>1</sup>Laboratory of Animal Physiology, Department of Zoology, Science School, University of Thessaloniki, Thessaloniki GR-54006, Greece and <sup>2</sup>Zoologisches Institut, Lehrstuhl für Tierphysiologie, Heinrich-Heine-Universität, Universitätsstrasse 1, 4000 Düsseldorf, Germany

\*Author for correspondence (e-mail: michaeli@bio.auth.gr)

Accepted 16 August; published on WWW 13 October 1999

## Summary

The effects of hypercapnia, together with low and high levels of extracellular  $\text{Ca}^{2+}$ , on heart activity and intracellular pH were examined in isolated perfused hearts from the land snail *Helix lucorum*. In addition, the intracellular level of  $\text{Ca}^{2+}$  was determined in slices of ventricles superfused with both normal and hypercapnic salines, containing low and high concentrations of  $\text{Ca}^{2+}$ , to investigate whether low extracellular pH affects the entry of  $\text{Ca}^{2+}$  into the heart cells. We also examined the effect of a saline that simulated the composition of the haemolymph of snails after estivating for 3 months on the heart activity and intracellular pH. The results showed that hypercapnia

causes decreases in the rate and force of heart contraction, and these are more pronounced in the presence of low levels of extracellular  $\text{Ca}^{2+}$ . Moreover, the present results indicate that  $\text{Ca}^{2+}$  maintains the contractility of the heart muscle under acidic conditions and seems to act by competing with protons for the  $\text{Ca}^{2+}$  binding sites on sarcolemma. The negative effect of hypercapnia on heart activity appears to be due to a reduction in extracellular pH rather than to changes in intracellular pH.

Key words: land snail, *Helix lucorum*, heart perfusion, hypercapnia, force and rate of contraction, intracellular pH.

## Introduction

The effect of hypercapnic acidosis on heart performance has been studied extensively in vertebrates, and it is known that an increase in the extracellular partial pressure of carbon dioxide ( $P_{\text{CO}_2}$ ) reduces the force and rate of heart contraction (Orchard and Kentish, 1990; Driedzic and Gesser, 1994). An increase in  $P_{\text{CO}_2}$  in extracellular fluids causes a decrease in the intracellular pH ( $\text{pH}_i$ ) of myocytes, which is thought to reduce contractile force through  $\text{H}^+$  competing for intracellular  $\text{Ca}^{2+}$  binding sites (Williamson et al., 1976). On the other hand, it has been shown by Langer (1985) and Langer et al. (1989) that low extracellular pH ( $\text{pH}_e$ ) reduces the rate of  $\text{Ca}^{2+}$  entry into heart cells. The mechanisms by which  $\text{H}^+$  might reduce  $\text{Ca}^{2+}$  entry into heart cells are not well known. It is believed that  $\text{Ca}^{2+}$  and  $\text{H}^+$  act in a competitive manner for the same binding sites on sarcolemma and indeed, several studies have shown that, when increased extracellularly,  $\text{Ca}^{2+}$  improves cardiac performance during hypercapnic acidosis (Gesser and Poupa, 1979; Lagerstrand and Poupa, 1980; Williamson et al., 1976). However, some data indicate that low extracellular pH causes conformational changes in  $\text{Ca}^{2+}$  channels or transporters, resulting in decreased  $\text{Ca}^{2+}$  entry into myocytes (Iijima and Hagiwara, 1986a); Kraffe and Kass, 1988; Klockner and Isenberg, 1994).

Although hypercapnia is a common response of many molluscs to various environmental conditions, little is known regarding the effects of hypercapnic acidosis on the  $\text{pH}_i$  of molluscan hearts and on cardiac activity. Hypercapnia and respiratory acidosis are greatly developed in land pulmonate snails during periods of estivation (Barnhart, 1986; Barnhart and McMahon, 1987; Rees and Hand, 1990) and the elevation of  $P_{\text{CO}_2}$  in the haemolymph of estivating snails results in a decrease in  $\text{pH}_e$  and  $\text{pH}_i$  (Barnhart and McMahon, 1988; Rees et al., 1991). On the other hand, mobilization of  $\text{CaCO}_3$  stores caused by hypercapnia causes an increase in  $\text{Ca}^{2+}$  levels in the haemolymph of estivating snails (Burton, 1976; Barnhart, 1986). Increases in  $\text{Ca}^{2+}$  levels in the haemolymph of estivating land snails play an important role in the acid–base balance (Burton, 1976); however, the exact role of  $\text{Ca}^{2+}$  ions on heart activity in snails during estivation remains unknown.

In the present work, we studied the effect of hypercapnic salines, containing different concentrations of  $\text{Ca}^{2+}$ , on the force and rate of contraction of isolated ventricles from the land snail *Helix lucorum*. This was done in order to elucidate how heart activity is influenced by hypercapnia in land pulmonates during estivation. In addition, the  $\text{pH}_i$  of the perfused ventricles was determined in order to examine

whether it plays any key role in the regulation of heart activity. Moreover, we examined whether low extracellular pH affects entry of  $\text{Ca}^{2+}$  into the heart cells. To examine this, using fura-2 we determined the intracellular concentration of  $\text{Ca}^{2+}$  in slices of heart muscle superfused under normal and hypercapnic conditions.

It is known that, as well as  $\text{Ca}^{2+}$ , the levels of some other solutes (e.g.  $\text{Mg}^{2+}$ ,  $\text{K}^+$ ) increase in the haemolymph of estivating snails (Barnhart, 1986). We measured the concentrations of  $\text{Na}^+$ ,  $\text{Mg}^{2+}$ ,  $\text{K}^+$  and  $\text{HCO}_3^-$  in the haemolymph of snails estivating for 3 months and then we created a saline simulating the composition of the corresponding haemolymph. Afterwards hearts were perfused with this saline in order to obtain some data concerning the effect of hypercapnia in relation to the changes of solutes in haemolymph on the heart activity.

### Materials and methods

Adult specimens of *Helix lucorum* (L.) were collected in the vicinity of Edessa, in northern Greece. The snails were kept in an active state at a temperature of  $25 \pm 0.5^\circ\text{C}$  and subjected to a 10.00 h:14.00 h L:D photoperiod in large glass boxes, with a daily supply of lettuce leaves and water. High humidity ( $85 \pm 1\%$ ) was maintained by sprinkling the interior of the boxes with water every day. To induce estivation, active snails were removed and transferred to glass boxes without food and water, but with ample aeration. The snails were kept for 3 months in a dormant state at the same conditions of temperature and photoperiod as described above.

#### Collection of haemolymph and determination of cations, pH and $P_{\text{CO}_2}$

Haemolymph samples from active snails and those

estivating for 1, 2 and 3 months were collected as described by Pedler et al. (1996). The concentrations of monovalent ( $\text{Na}^+$ ,  $\text{K}^+$ ) and divalent ( $\text{Ca}^{2+}$ ,  $\text{Mg}^{2+}$ ) cations in the haemolymph of active and estivating snails were measured by atomic absorption spectrophotometry as described by Wieser (1981).

Haemolymph pH ( $\text{pH}_e$ ) was measured with a capillary pH electrode (G299A, BMS Mk2, Radiometer, Copenhagen) calibrated at  $25^\circ\text{C}$  with Radiometer precision buffers.  $P_{\text{CO}_2}$  was extrapolated after determination of total  $\text{CO}_2$  ( $C_{\text{CO}_2}$ ) according to the method of Cameron (1971) using a Radiometer  $P_{\text{CO}_2}$  electrode (E5037) and calibrated with known concentrations of  $\text{NaHCO}_3$ . Haemolymph  $P_{\text{CO}_2}$  was calculated by the modified equation of Henderson–Hasselbach:

$$P_{\text{CO}_2} = C_{\text{CO}_2} / [10^{\text{pH}-\text{pK}} \times \alpha_{\text{CO}_2} + \alpha_{\text{CO}_2}], \quad (1)$$

using a pK value of 6.189 and solubility of  $\text{CO}_2$  ( $\alpha_{\text{CO}_2}$ ) of  $0.044 \text{ mmol l}^{-1} \text{ mmHg}^{-1}$  at  $25^\circ\text{C}$  (Barnhart, 1986). The concentration of bicarbonate ( $[\text{HCO}_3^-]_e$ ) in haemolymph samples was calculated according to the following equation:

$$[\text{HCO}_3^-]_e = C_{\text{CO}_2} - (\alpha_{\text{CO}_2} \times P_{\text{CO}_2}). \quad (2)$$

#### Perfusion of the ventricles of *Helix lucorum*

Perfusion of isolated ventricles was performed as described by Wernham and Lukowiak (1983). After removing the shell, the heart was dissected out and a cannula was placed in the ventricle through the auricle. The auricle–ventricle junction was ligated so that the auricle attached to the ventricle was not filled with the perfusion buffer. A small hook, connected by a thread to a force-displacement transducer, was placed on the tip of the ventricle. The perfusion saline was delivered into the ventricle through a three-way valve at a pressure head of 8 cm  $\text{H}_2\text{O}$ . The normal saline used was composed according to measured concentrations of monovalent and divalent cations

Table 1. Haemolymph solute concentrations, extracellular pH and  $P_{\text{CO}_2}$  in haemolymph and  $\text{pH}_i$  of ventricles in active and estivating *Helix lucorum*

| Solute               | Estivation time     |                     |                     |                     |
|----------------------|---------------------|---------------------|---------------------|---------------------|
|                      | Active              | 1 month             | 2 months            | 3 months            |
| $[\text{Na}^+]$      | $67.17 \pm 2.02^a$  | $75.00 \pm 5.00^b$  | $89.00 \pm 1.00^c$  | $69.39 \pm 2.01^d$  |
| $[\text{HCO}_3^-]_e$ | $20.84 \pm 0.73^a$  | $21.58 \pm 1.48^b$  | $31.48 \pm 0.00^c$  | $19.72 \pm 0.04^b$  |
| $[\text{K}^+]$       | $3.22 \pm 0.11^a$   | $6.10 \pm 1.00^b$   | $5.20 \pm 0.40^c$   | $4.77 \pm 0.43^c$   |
| $[\text{Mg}^{2+}]$   | $1.23 \pm 0.01^a$   | $2.43 \pm 0.14^b$   | $3.46 \pm 0.01^b$   | $12.63 \pm 1.43^b$  |
| $[\text{Ca}^{2+}]_e$ | $6.85 \pm 0.28^a$   | $8.97 \pm 0.19^a$   | $9.52 \pm 0.65^a$   | $27.25 \pm 1.89^b$  |
| $\text{pH}_e$        | $7.75 \pm 0.04^a$   | $7.48 \pm 0.04^b$   | $7.56 \pm 0.02^b$   | $7.44 \pm 0.03^b$   |
| $P_{\text{CO}_2}$    | $13.06 \pm 0.41^a$  | $26.73 \pm 2.45^b$  | $29.08 \pm 0.41^b$  | $25.66 \pm 1.52^b$  |
| $\text{pH}_i$        | $7.052 \pm 0.017^a$ | $7.057 \pm 0.017^a$ | $7.088 \pm 0.018^a$ | $7.033 \pm 0.016^a$ |

Haemolymph solutes are expressed in  $\text{mmol l}^{-1}$ ,  $P_{\text{CO}_2}$  in mmHg.

$\text{pH}_e$ , extracellular pH;  $\text{pH}_i$ , intracellular pH.

Values are means  $\pm$  S.E.M.,  $N=10$  determinations from separate preparations of animals.

Different subscript letters indicate significant differences within the same row as determined by applying Bonferroni  $t$ -test: for  $[\text{Na}^+]$ : a–b NS; a–c  $P < 0.001$ ; a–d NS; b–c  $P < 0.05$ ; b–d NS; c–d  $P < 0.001$ ; for  $[\text{HCO}_3^-]_e$ : a–b NS; a–c  $P < 0.001$ ; b–c  $P = 0.001$ ; for  $[\text{K}^+]$ : a–b  $P < 0.01$ ; a–c NS; b–c NS; for  $[\text{Mg}^{2+}]$ : a–b  $P < 0.001$ ; for  $[\text{Ca}^{2+}]_e$ : a–b  $P < 0.001$ ; for  $\text{pH}_e$ : a–b  $P < 0.001$ ; for  $P_{\text{CO}_2}$ : a–b  $P < 0.001$ .

NS, not significant.

and the  $[\text{HCO}_3^-]_e$  calculated in the haemolymph of normal snails (Table 1). The composition of the normal saline (saline A) was:  $46 \text{ mmol l}^{-1}$  NaCl,  $3.2 \text{ mmol l}^{-1}$  KCl,  $1.25 \text{ mmol l}^{-1}$   $\text{MgCl}_2$ ,  $6.85 \text{ mmol l}^{-1}$   $\text{CaCl}_2$  and  $21 \text{ mmol l}^{-1}$   $\text{NaHCO}_3$  (see also Table 2). Saline A was equilibrated with air and its pH was adjusted to pH 7.75 prior to the experiments.

#### Experimental protocols

Four experimental protocols (all performed at  $25^\circ\text{C}$ ) were applied to the isolated perfused ventricles. The purpose of the first experiment was to examine the effect of hypercapnic salines, in the presence of normal levels ( $6.85 \text{ mmol l}^{-1}$ ) of extracellular  $\text{Ca}^{2+}$ , on the force and rate of heart contraction as well as on  $\text{pH}_i$ . The first hypercapnic saline had the same composition as saline A except that it was equilibrated with 10%  $\text{CO}_2$  in air, pH 7.2 (saline B) (Table 2). Two other hypercapnic salines used had the same composition as saline A except that they were equilibrated with 10% of  $\text{CO}_2$  in air and contained either  $15 \text{ mmol l}^{-1}$   $\text{NaHCO}_3$  (pH 7.0) (saline C) or  $5 \text{ mmol l}^{-1}$   $\text{NaHCO}_3$  (pH 6.6) (saline D; Table 2). Gas mixtures were obtained using a Woesthoff (Bochum, Germany) gas-mixing pump. Before perfusion of ventricles with any of the above hypercapnic salines, ventricles were preincubated with saline A until a stable heart frequency was obtained. Ventricles were perfused with the above hypercapnic salines for 1 h and recordings of ventricle beats were monitored continuously on a chart recorder. To determine the  $\text{pH}_i$  of ventricles perfused under the conditions described above, we repeated the experiment and ventricles were removed from the perfusion system at intervals of 10, 30 and 60 min after perfusion with all of the above hypercapnic salines. Hearts were frozen in liquid nitrogen and held thus until  $\text{pH}_i$  was determined. Ventricles perfused with the saline A were used as controls (0 min).

The purpose of second experiment was to examine whether changes in extracellular level of  $\text{Ca}^{2+}$  affect the heart activity as well as  $\text{pH}_i$  under hypercapnic acidosis. We therefore perfused ventricles in the presence of extracellular concentrations of  $\text{Ca}^{2+}$  lower or higher than  $6.85 \text{ mmol l}^{-1}$ . Specifically, ventricles were perfused initially with saline A containing  $6.85 \text{ mmol l}^{-1}$   $\text{Ca}^{2+}$  and then with the saline B containing one of the following concentrations of  $\text{Ca}^{2+}$ :  $3 \text{ mmol l}^{-1}$ ,  $11 \text{ mmol l}^{-1}$ ,  $15 \text{ mmol l}^{-1}$  or  $30 \text{ mmol l}^{-1}$ . The  $\text{pH}_i$

of ventricles was determined after perfusing them with the above hypercapnic salines for 1 h.

The importance of extracellular  $\text{Ca}^{2+}$  on  $\text{pH}_i$  and heart activity under hypercapnic acidosis was examined further in the third experiment. Specifically, we examined the effect of an organic and inorganic blockers of  $\text{Ca}^{2+}$  entry into cells on the force and rate of ventricle contraction and on the  $\text{pH}_i$  of ventricles perfused under hypercapnic conditions. Ventricles were perfused initially with saline A containing  $6.85 \text{ mmol l}^{-1}$   $\text{Ca}^{2+}$  and then the perfusate was changed to saline B containing the same concentration of  $\text{Ca}^{2+}$  as saline A plus  $10^{-4} \text{ mol l}^{-1}$  verapamil or  $10^{-4} \text{ mol l}^{-1}$   $\text{Co}^{2+}$ , both of which are known to affect  $\text{Ca}^{2+}$  entry into molluscan heart cells (Devlin, 1993a,b). Ventricles were perfused under the above conditions for 1 h and recordings were taken as described in the first experiment. To determine the  $\text{pH}_i$  of ventricles perfused under the above conditions, we repeated the experiment and ventricles were removed from the perfusion system at intervals of 10, 30 and 60 min and kept frozen in liquid nitrogen until  $\text{pH}_i$  was determined. Ventricles perfused with saline A were used as controls (0 min).

In the fourth experiment, we examined the effect of a saline that simulated the composition of haemolymph of snails after estivating for 3 months on the force and rate of ventricle contraction and on  $\text{pH}_i$ . This saline consisted of measured concentrations of divalent and monovalent cations and the  $[\text{HCO}_3^-]_e$  calculated in the haemolymph of estivating snails (Table 1):  $49 \text{ mmol l}^{-1}$  NaCl,  $4.8 \text{ mmol l}^{-1}$  KCl,  $12.6 \text{ mmol l}^{-1}$   $\text{MgCl}_2$ ,  $27 \text{ mmol l}^{-1}$   $\text{CaCl}_2$  and  $20 \text{ mmol l}^{-1}$   $\text{NaHCO}_3$ . The pH of this saline was adjusted to a value of 7.4.  $P_{\text{CO}_2}$  of the saline was determined using a  $P_{\text{CO}_2}$  electrode after pH adjustment and was found to be about 27 mmHg. Before applying the above saline, ventricles were perfused initially with saline A in the presence of normal levels of  $\text{Ca}^{2+}$  ( $6.85 \text{ mmol l}^{-1}$ ). Ventricles were perfused with this saline for 1 h and recordings of ventricle beats were taken as described previously. To determine the  $\text{pH}_i$  of ventricles perfused under the above conditions we repeated the experiment and the ventricles were removed from the perfusion system at intervals of 10, 30 and 60 min. They were frozen in liquid nitrogen and thus stored until  $\text{pH}_i$  was determined. Ventricles perfused with saline A were used as controls.

#### Determination of $\text{pH}_i$

The  $\text{pH}_i$  was determined by the homogenate method developed by Pörtner et al. (1990). In brief, ventricles were ground under liquid nitrogen and then 100 mg of tissue powder were put into an Eppendorf vial (600  $\mu\text{l}$ ) containing 200  $\mu\text{l}$  ice-cold medium ( $160 \text{ mmol l}^{-1}$  KF,  $1 \text{ mmol l}^{-1}$  nitrilotriacetic acid, pH 7.4). After completely filling the vial with the medium, the mixture was first stirred with a needle in order to release air bubbles, mixed in a Vortex mixer, and then centrifuged for 30 s. Within 3 min after thawing of the tissue powder in the medium, the pH of the supernatant was measured at  $25^\circ\text{C}$  using a capillary pH electrode G299A, as described previously for the determination of  $\text{pH}_e$ . In addition to determining  $\text{pH}_i$  in

Table 2. Composition and pH of normal saline A and hypercapnic salines B, C and D

| Saline | Constituents ( $\text{mmol l}^{-1}$ ) |     |                 |                 |                  | pH    |
|--------|---------------------------------------|-----|-----------------|-----------------|------------------|-------|
|        | NaCl                                  | KCl | $\text{MgCl}_2$ | $\text{CaCl}_2$ | $\text{NaHCO}_3$ |       |
| A      | 46                                    | 3.2 | 1.25            | 6.85            | 21               | 7.75  |
| B      | 46                                    | 3.2 | 1.25            | 6.85            | 21               | 7.20* |
| C      | 52                                    | 3.2 | 1.25            | 6.85            | 15               | 7.00* |
| D      | 62                                    | 3.2 | 1.25            | 6.85            | 5                | 6.60* |

\*The salines B, C and D were equilibrated with 10%  $\text{CO}_2$  in air before use.

the perfused ventricles, we also determined  $pH_i$  of hearts from active snails and those estivating for 1, 2 or 3 months.

#### Measurement of intracellular $Ca^{2+}$

Measurement of intracellular  $Ca^{2+}$  was performed in superfused slices of ventricles in a manner similar to that described by Bickler (1992). Before superfusing the ventricle slices, they were incubated at 30 °C for 2 h in 10 ml of normal saline containing 10  $\mu\text{mol ml}^{-1}$  fura-2 acetoxy-methylester (fura-2/AM) (Sigma Chemical Co, USA). The slices were then transferred to Petri dishes filled with normal saline and washed for 5 min. Afterwards they were mounted on a mesh baffle and fitted into a fluorometer cuvette. A cap, fitted with stainless steel inlet and outlet tubing, was then used to seal the cuvette. The cuvette was then placed in the cuvette holder of a Shimadzu fluorometer and positioned so that the excitation light fell within the confines of the slices. The inlet tubing was connected to chambers containing the perfusates. Ventricle slices were superfused continuously with saline B, containing either a low (3  $\text{mmol l}^{-1}$ ) or high concentration (27  $\text{mmol l}^{-1}$ ) of  $Ca^{2+}$ . Before superfusing slices with saline B in the presence of 3  $\text{mmol l}^{-1}$  or 27  $\text{mmol l}^{-1}$  of  $Ca^{2+}$ , ventricles were perfused with saline A, containing, respectively, either 3  $\text{mmol l}^{-1}$  or 27  $\text{mmol l}^{-1}$  of  $Ca^{2+}$ . The cuvette holder and perfusing solution were both temperature-controlled at 25 °C. Slices were alternately excited at 340 and 380 nm wavelengths and fluorescence intensity at 510 nm was recorded every 0.5 s using the fluorometer. Intracellular  $Ca^{2+}$  levels ( $[Ca^{2+}]_i$ ;  $\text{nmol l}^{-1}$ ) were calculated from fluorescent ratios (340/380) using the equation

$$[Ca^{2+}]_i = K_d [(R - R_{\min}) / (R_{\max} - R)] (F_0/F_1), \quad (3)$$

where  $K_d$  is the dissociation constant (224  $\text{nmol l}^{-1}$ ) and  $R$  is the ratio of fluorescence intensity excited by 340/380 nm.  $F_0/F_1$  is the ratio of the 380 nm excitation intensity at zero and saturating  $[Ca^{2+}]_i$  levels. The fluorescence at 340 and 380 nm for  $Ca^{2+}$ -saturated ( $R_{\max}$ ) and free dye ( $R_{\min}$ ) was determined by applying digitonin to a final concentration of 50  $\mu\text{mol l}^{-1}$  to the cuvette, followed by 10  $\text{mmol l}^{-1}$  Tris-HCl (pH 7.4) or 20  $\text{mmol l}^{-1}$  EGTA, respectively.

#### Statistical analysis

The results are presented as means  $\pm$  S.E.M. Significance of differences was tested using Bonferonni's test, which permits multiple comparisons to be taken into consideration. The limit of significance was set at various levels, as indicated in the corresponding Tables and Figures.

### Results

The effect of estivation on acid-base variables and the concentrations of divalent and monovalent cations are given in Table 1, which also shows the pH of haemolymph ( $pH_e$ ) and the intracellular pH ( $pH_i$ ) of hearts from both active and estivating snails for 1, 2 and 3 months.  $pH_e$ , although variable, declined progressively during estivation and was determined to be  $7.44 \pm 0.03$  after 3 months.  $P_{CO_2}$  increased significantly

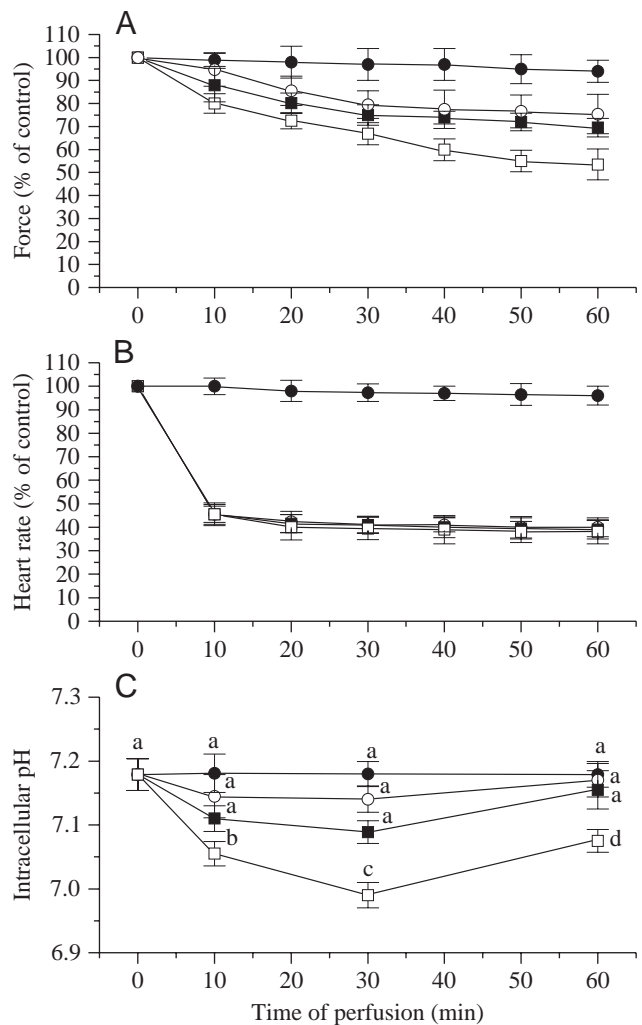

Fig. 1. Effect of hypercapnic salines in the presence of 6.85  $\text{mmol l}^{-1}$   $Ca^{2+}$  on (A) the force, (B) the rate of contraction and (C) the intracellular pH of isolated perfused ventricles. (●) saline A, pH 7.75; (○) saline B, pH 7.2; (■) saline C, pH 7.0; (□) saline D, pH 6.6. Values are means  $\pm$  S.E.M.,  $N=10$  determinations from separate preparations of animals. In C, different subscript letters indicate significant differences within the same plot; for □, pH 6.6: a-b  $P < 0.001$ ; a-c  $P < 0.001$ ; a-d  $P < 0.05$ ; b-c NS; b-d NS; c-d  $P < 0.05$ . NS, not significant.

within the first 2 months and afterwards it decreased slightly. Similarly, the concentration of  $[HCO_3^-]_e$  increased within the first 2 months, but afterwards it decreased to control levels. From the determined divalent and monovalent cations,  $Ca^{2+}$  and  $Mg^{2+}$  showed the most pronounced changes in the haemolymph of estivating snails. Both  $Ca^{2+}$  and  $Mg^{2+}$  increased during estivation up to about  $27.25 \pm 1.89 \text{ mmol l}^{-1}$  and  $12.63 \pm 1.43 \text{ mmol l}^{-1}$  after 3 months, respectively. In contrast, the  $pH_i$  of hearts remained at control levels during estivation.

Under normal conditions of perfusion, ventricles beat at a stable rate ( $29 \pm 2 \text{ beats min}^{-1}$ ,  $N=10$ ) and only a slight reduction (6%) in force of contraction was observed after 1 h of perfusion

(Fig. 1A). However, there was a gradual reduction of force of contraction as a function of  $\text{pH}_e$  (Fig. 1A), while rate of contraction ( $\text{beats min}^{-1}$ ) declined between  $\text{pH}$  7.75 and 7.2, without further changes at lower  $\text{pH}$  values (Fig. 1B). Specifically, the contractile force of ventricles decreased by about 25%, 30% and 47% after 60 min of perfusion with salines B, C and D, respectively, in the presence of  $6.85 \text{ mmol l}^{-1} \text{ Ca}^{2+}$ . The  $\text{pH}_i$  ( $7.179 \pm 0.025$ ) remained stable in the ventricles perfused for 60 min with saline A (Fig. 1C). Also, perfusion of ventricles with the hypercapnic salines B and C did not cause any significant reduction in  $\text{pH}_i$ . Perfusion of ventricles with saline D, however, caused a significant reduction in  $\text{pH}_i$  compared to control values ( $P < 0.001$ ) within the first 30 min of perfusion. After 30 min of perfusion, however,  $\text{pH}_i$  was recovering slowly towards the control level (Fig. 1C).

Perfusion of ventricles with the hypercapnic saline B in the presence of  $3 \text{ mmol l}^{-1} \text{ Ca}^{2+}$  caused greater decreases in the contractile force (66%) compared to ventricles perfused with the corresponding hypercapnic saline, but containing  $6.85 \text{ mmol l}^{-1} \text{ Ca}^{2+}$  (25%) (Fig. 2). Increases in the concentration of  $\text{Ca}^{2+}$  in the hypercapnic saline B to  $>6.85 \text{ mmol l}^{-1}$  did not further improve the contractility and rate of contraction of ventricles and had nearly the same effects as perfusion in the presence of  $6.85 \text{ mmol l}^{-1} \text{ Ca}^{2+}$ .  $\text{pH}_i$  was determined to be  $7.174 \pm 0.03$ ,  $7.21 \pm 0.035$ ,  $7.20 \pm 0.025$  and  $7.185 \pm 0.036$  after 60 min of perfusion with saline B containing  $3 \text{ mmol l}^{-1}$ ,  $11 \text{ mmol l}^{-1}$ ,  $15 \text{ mmol l}^{-1}$  or  $30 \text{ mmol l}^{-1}$  of  $\text{Ca}^{2+}$ , respectively.

The effects of the combination of hypercapnia and verapamil or hypercapnia and  $\text{Co}^{2+}$  on the contractile force, rate of contraction and  $\text{pH}_i$  of ventricles are shown in Fig. 3. Perfusion of ventricles with the saline B in the presence of verapamil ( $10^{-4} \text{ mol l}^{-1}$ ) caused a marked reduction in the force and rate of ventricle contraction (Fig. 3A). Similar results were obtained in the presence of  $\text{Co}^{2+}$  ( $10^{-4} \text{ mol l}^{-1}$ ) (Fig. 3B). In both cases, however, the  $\text{pH}_i$  of ventricles, after an initial increase, remained stable during perfusion (Fig. 3C).

The effects of the saline simulating the composition of haemolymph of snails estivating for 3 months on the perfused ventricles are shown in Fig. 4. The contractile force of ventricles was reduced by about 18% (Fig. 4A) and the rate of ventricle beating by about 60% (Fig. 4B) after perfusion with the above saline. The  $\text{pH}_i$  remained stable in the ventricles perfused under the same conditions (Fig. 4C).

To examine whether low extracellular  $\text{pH}$  affects the influx of  $\text{Ca}^{2+}$  into the heart cells, we determined the intracellular concentration of  $\text{Ca}^{2+}$  in ventricles perfused with salines A and B, containing either  $3 \text{ mmol l}^{-1} \text{ Ca}^{2+}$  or  $27 \text{ mmol l}^{-1} \text{ Ca}^{2+}$  (Fig. 5). There was no effect on the level of intracellular  $\text{Ca}^{2+}$  in ventricles perfused with the hypercapnic saline B containing  $27 \text{ mmol l}^{-1} \text{ Ca}^{2+}$ , while perfusion of ventricles in the presence of  $3 \text{ mmol l}^{-1} \text{ Ca}^{2+}$  caused a significant decrease in the level of intracellular  $\text{Ca}^{2+}$ .

## Discussion

Similar to other land snails (Barnhart, 1986; Rees and Hand,

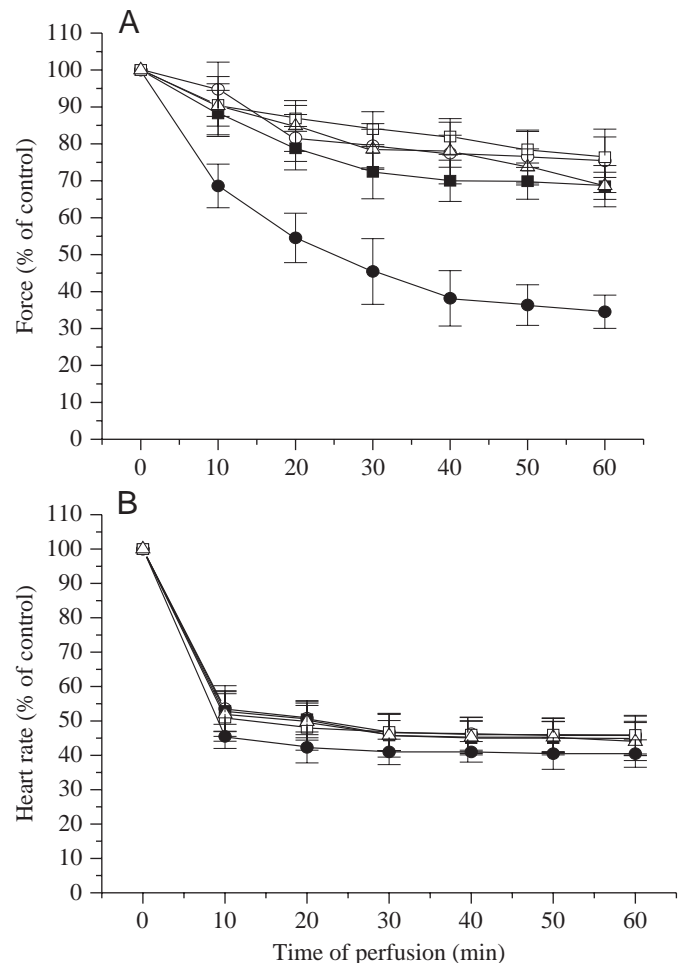

Fig. 2. Effect of hypercapnic saline B ( $\text{pH}$  7.2) in the presence of low and high concentrations of  $\text{Ca}^{2+}$  on (A) the force and (B) the rate of contraction of isolated perfused ventricles. (●)  $3 \text{ mmol l}^{-1} \text{ Ca}^{2+}$ ; (○)  $6.85 \text{ mmol l}^{-1} \text{ Ca}^{2+}$ ; (■)  $11 \text{ mmol l}^{-1} \text{ Ca}^{2+}$ ; (□)  $15 \text{ mmol l}^{-1} \text{ Ca}^{2+}$ ; (△)  $30 \text{ mmol l}^{-1} \text{ Ca}^{2+}$ . Values are means  $\pm$  S.E.M.,  $N=10$  determinations from separate preparations of animals.

1990), *Helix lucorum* experiences hypercapnia and respiratory acidosis during estivation (Table 1). The results from in vitro experiments on isolated perfused ventricles indicate that hypercapnia may negatively affect the heart activity in estivating snails. Specifically, it seems that hypercapnia causes a marked decrease in the rate and, to a lesser extent, in the ability of heart muscle to generate force. However, these changes in heart activity seem to be correlated with a reduction in extracellular  $\text{pH}$  rather than with that of intracellular  $\text{pH}$ . As shown in Fig. 1, a reduction of  $\text{pH}$  in the perfusates, by changing the concentration of bicarbonates, resulted in a significant reduction in the contractility (Fig. 1A) and rate of ventricle beating (Fig. 1B). However, there does not seem to be any correlation between heart activity and changes in  $\text{pH}$  of intracellular fluids, since perfusion of ventricles with hypercapnic salines does not appear to cause a significant reduction of  $\text{pH}_i$  (Fig. 1C). Only when ventricles were perfused with hypercapnic saline containing  $5 \text{ mmol l}^{-1}$



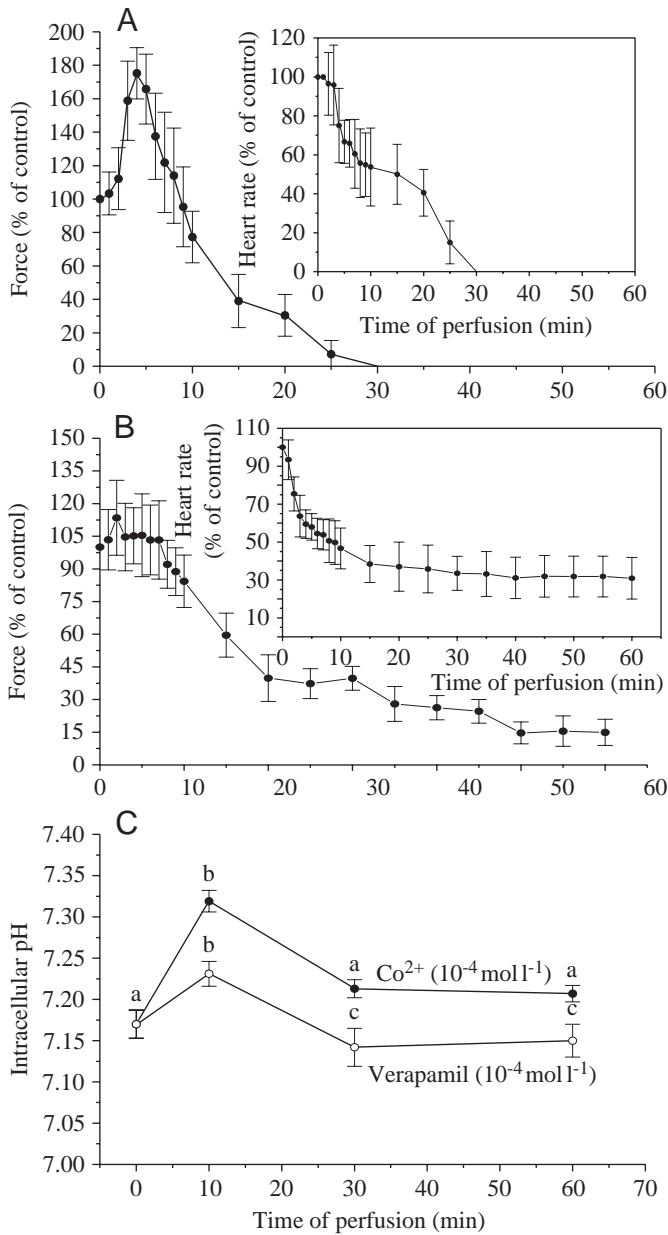

Fig. 3. Effect of hypercapnic saline B (pH 7.2) in the presence of  $10^{-4} \text{ mol l}^{-1}$  verapamil (A) and  $10^{-4} \text{ mol l}^{-1}$   $\text{Co}^{2+}$  (B) on the force, rate of contraction and intracellular pH of isolated perfused ventricles. Values are means  $\pm$  S.E.M.,  $N=10$  determinations from separate preparations of animals. In C, different subscript letters indicate significant differences in the same plot: (●)  $\text{Co}^{2+}$ ; a-b  $P<0.001$ ; (○) verapamil: a-b NS; a-c NS; b-c  $P<0.05$ . NS, not significant.

$\text{NaHCO}_3$ , did  $\text{pH}_i$  fall significantly within the first 30 min; thereafter it recovered at a slow rate (Fig. 1C).

The reduction in force was more significant when ventricles were treated with hypercapnic salines containing  $3 \text{ mmol l}^{-1}$   $\text{Ca}^{2+}$  (Fig. 2). Nevertheless, even in this case, the changes in ventricle activity did not appear to correlate with changes in the  $\text{pH}_i$ , since  $\text{pH}_i$  did not change after 60 min of perfusion in the presence of low levels of  $\text{Ca}^{2+}$ . The above results indicate

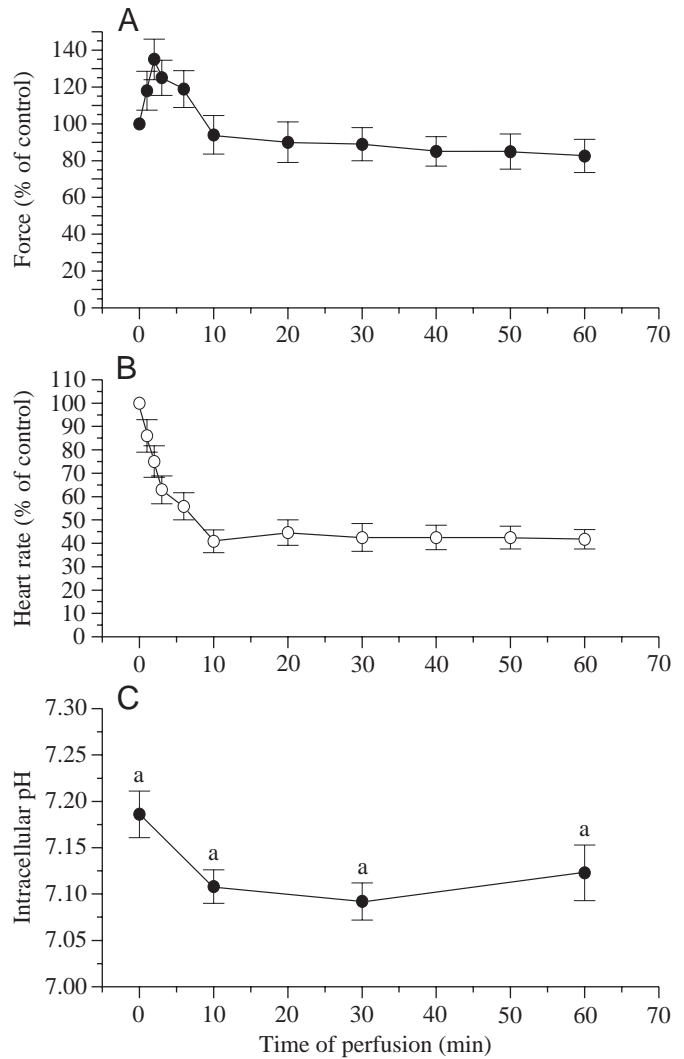

Fig. 4. Effect of a saline simulating the composition of hymolymph of snails estivated for 3 months, on (a) the force, (b) rate of contraction and (c) intracellular pH of isolated perfused ventricles. Values are means  $\pm$  S.E.M.,  $N=10$  determinations from separate preparations of animals. <sup>a</sup> Differences within the plot in C are not significant.

that high extracellular concentrations of  $\text{Ca}^{2+}$  may counteract the acidic effect of hypercapnia on heart contractility in land snails during estivation. On the contrary, increased extracellular levels of  $\text{Ca}^{2+}$  do not seem to restore the rate of heart contraction during hypercapnia. However, concentrations of  $\text{Ca}^{2+}$  higher than  $6.85 \text{ mmol l}^{-1}$  did not completely restore the contractility of the heart during perfusion with hypercapnic salines (Fig. 2). This response of ventricles' contractility to increasing extracellular  $\text{Ca}^{2+}$  under hypercapnic acidosis seems to be similar to that observed under normal conditions of perfusion. As reported, the contractile tension of ventricles rises to a plateau level with increasing concentrations of  $\text{Ca}^{2+}$  (Burton and Mackay, 1970).

The data obtained using verapamil and  $\text{Co}^{2+}$  (Fig. 3) show a high dependence of heart activity on the rate of  $\text{Ca}^{2+}$  entry

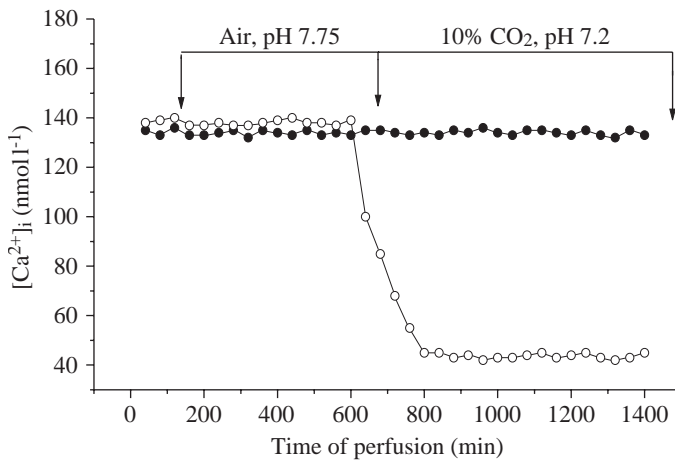

Fig. 5. Typical recordings of the effect of hypercapnic saline B equilibrated in air (pH 7.75) and in 10% CO<sub>2</sub> (pH 7.2) in the presence of low (3 mmol l<sup>-1</sup>) (○) and high (27 mmol l<sup>-1</sup>) (●) concentrations of extracellular Ca<sup>2+</sup> on the [Ca<sup>2+</sup>]<sub>i</sub> in isolated superfused slices of ventricles.

into the cells. These results are similar to those obtained from other land snails and they show that extracellular Ca<sup>2+</sup> plays an important role in the snail heart, both in excitation-contraction and in the generation of the action potentials (Elekes et al., 1973; Kiss and S.-Roza, 1973; Paul, 1961). Our results indicate that H<sup>+</sup> ions might negatively influence Ca<sup>2+</sup> entry into the heart cells of *Helix lucorum* and that increases in extracellular Ca<sup>2+</sup> might counteract this negative effect (Fig. 5). The intracellular concentration of Ca<sup>2+</sup> was about 135±16 nmol l<sup>-1</sup> in the ventricles of normal snails, a value which is similar to that reported for muscles from other invertebrates (Ishii et al., 1989), vertebrates (Batle et al., 1993) and also for the brain of the turtle *Trachemys scripta* (Bickler, 1992). Superfusion of ventricle slices under hypercapnia in the presence of 27 mmol l<sup>-1</sup> Ca<sup>2+</sup> did not cause any change in the intracellular concentration of Ca<sup>2+</sup>. In contrast, the latter decreased significantly when slices of ventricles were superfused under the same hypercapnic conditions but in the presence of 3 mmol l<sup>-1</sup> Ca<sup>2+</sup> (Fig. 5). The above results are similar to those reported for vertebrates, where hypercapnic acidosis depresses cardiac activity. The mechanisms by which low extracellular pH modulates heart activity in vertebrates are not well understood. It has been reported that low pH reduces contractile force through competition by H<sup>+</sup> for Ca<sup>2+</sup>-binding sites intracellularly and, possibly, extracellularly (Williamson et al., 1976). Competition of H<sup>+</sup> for the Ca<sup>2+</sup> binding sites is supported by studies demonstrating a reversal of acidosis depression by increasing extracellular Ca<sup>2+</sup> (Williamson et al., 1976; Yee and Jackson, 1984; Lagerstrand and Poupa, 1980; Gesser and Poupa, 1979). On the other hand, it has been shown that the strength of cardiac muscle contraction is determined by the magnitude of Ca<sup>2+</sup> bound to sarcolemmal surface receptors (Langer, 1985; Philipson et al., 1980; Bers et al., 1981) which, in turn, corresponds to the concentration of extracellular Ca<sup>2+</sup> (Philipson et al., 1980). Moreover, it has

been reported that conformational changes in Ca<sup>2+</sup> channels or transporters and changes in the voltage dependence of channel gating caused by low pH might decrease Ca<sup>2+</sup> entry into heart cells (Iijima and Hagiwara, 1986; Ohmori and Yoshii, 1977). Besides, H<sup>+</sup> can block the channel, possibly in the channel pore (Krafte and Kass, 1988; Klockner and Isenberg, 1994).

Although it becomes obvious from the results presented that low extracellular pH has a negative effect on heart activity, it is unclear what is the exact role of extracellular pH on the modulation of heart activity in *Helix lucorum* during estivation. This difficulty is due to the fact that the levels of acid-base parameters vary in the haemolymph of *Helix lucorum* during estivation (Table 1) and, as has been reported previously, these changes may reflect periodic bursts of ventilation in land snails (Barnhart and McMahon, 1987; Rees and Hand, 1990). Moreover, the levels of several solutes change in the haemolymph of estivating snails and they may also be involved in the modulation of heart activity. Specifically, the levels of Ca<sup>2+</sup> and Mg<sup>2+</sup>, which have opposite effects on heart activity (Burton and Mackay, 1970; Burton and Loudon, 1972) increase significantly in the haemolymph of estivating snails compared to controls (Table 1). Perfusion of ventricles with the saline simulating the haemolymph of estivating snails caused a reduction in contractile force of about 18% (Fig. 4A) and a reduction in the rate of contraction of about 59% (Fig. 4B). However, the above conditions of perfusion did not cause any change in pH<sub>i</sub> of ventricles (Fig. 4C). Taking into consideration all the above data, it could be concluded that it is not only the extracellular pH but the combination of the acid-base status and the various solutes which may affect heart activity in land snails during estivation. Moreover, recent data indicate that the biogenic amines serotonin and dopamine are involved in the modulation of heart activity in estivating snails (Rofalickou et al., 1999).

According to the results presented, the heart of *Helix lucorum* seems to defend itself against a drop in extracellular pH and maintains a stable pH<sub>i</sub> during estivation (Table 1). The maintenance of pH<sub>i</sub> at stable levels seems to be in conflict with the effect of artificial hypercapnia on the pH<sub>i</sub> of whole body of other land snail species. Determination of pH<sub>i</sub> of the whole body either by DMO (Barnhart and McMahon, 1988) or by NMR (Rees et al., 1991) has shown that artificial hypercapnia causes decreases in the pH<sub>i</sub>. The acid-base variables in the haemolymph of *Helix lucorum* (Table 1) are in accordance with those reported for the haemolymph from other land snails (Barnhart, 1986; Rees and Hand, 1991) and the pH<sub>i</sub> in the heart of *Helix lucorum* is similar to that reported for the hearts of other molluscs (Ellington, 1993; Kinsey and Ellington, 1995). Perhaps pH<sub>i</sub> fluctuations in tissues as small as the heart cannot be recorded when pH<sub>i</sub> is determined by DMO and NMR in the whole body. The recovery of pH<sub>i</sub> in the perfused ventricles of *Helix lucorum* under hypercapnia indicates that mechanisms of ion exchange of acid-base equivalents between intracellular and extracellular compartments may exist in cardiac muscles. This suggestion is in accordance with data which indicate that regulation of pH<sub>i</sub> in the nervous and muscular system of land

snails may involve tightly linked  $\text{Cl}^-$ - $\text{HCO}_3^-$  and  $\text{Na}^+$ - $\text{H}^+$  exchange (Thomas, 1977; Ellington, 1993; Zange et al., 1990). The physiological importance of  $\text{pH}_i$  maintenance at stable levels in the heart of land snails during estivation is not clear. However, recent data indicate that the circulatory system of snails is involved in gas exchange during estivation (Rofalikou et al., 1999). Consequently, maintenance of heart  $\text{pH}_i$  at stable levels may be of great physiological importance since it might preserve heart activity.

The authors wish to thank D. Haas for his technical assistance with the determination of intracellular pH.

### References

- Barnhart, M. C.** (1986). Control of acid-base status in active and dormant land snails, *Otala lactea* (Pulmonata, Helicidae). *J. Comp. Physiol. B* **156**, 347–354.
- Barnhart, M. C. and McMahon, B. R.** (1987). Discontinuous carbon dioxide release and metabolic depression in dormant land snails. *J. exp. Biol.* **128**, 123–138.
- Barnhart, M. C. and McMahon, B. R.** (1988). Depression of aerobic metabolism and intracellular pH by hypercapnia in land snails, *Otala lactea*. *J. exp. Biol.* **138**, 289–299.
- Batle, C. D., Peces, R., LaPointe, S. M., Ye, M. and Daugirdas, T. J.** (1993). Cytosolic free calcium regulation in response to acute changes in intracellular pH in vascular smooth muscle. *Am. J. Physiol.* **264**, C932–C943.
- Bers, M. D., Philipson, D. K. and Langer, A. G.** (1981). Cardiac contractility and sarcolemmal calcium binding in several cardiac muscle preparations. *Am. J. Physiol.* **240**, H576–H583.
- Bickler, E. P.** (1992). Cerebral anoxia tolerance in turtles: regulation of intracellular calcium and pH. *Am. J. Physiol.* **263**, R1298–1302.
- Burton, F. R.** (1976). Calcium metabolism and acid-base balance in *Helix pomatia*. In *Perspectives in Experimental Biology*, vol. 1 (ed. P. S. Davies), pp. 7–16. Oxford: Pergamon Press.
- Burton, F. R. and Loudon, R. L.** (1972). The antagonistic actions of calcium and magnesium on the perfused ventricle of the snail *Helix pomatia*. *J. Physiol.* **220**, 363–381.
- Burton, F. R. and Mackay, J. M.** (1970). The influence of cations on contracture in the superfused ventricle of *Helix aspersa*. *Experientia* **26**, 151–152.
- Cameron, J. N.** (1971). Rapid method for determination of total carbon dioxide in small blood samples. *J. Appl. Physiol.* **31**, 632–634.
- Devlin, C. L.** (1993a). An analysis of control of the ventricle of the mollusc *Mercenaria mercenaria*. I. Ionic basis of autorhythmicity. *J. exp. Biol.* **179**, 47–61.
- Devlin, C. L.** (1993b). An analysis of control of the ventricle of the mollusc *Mercenaria mercenaria*. II. Ionic mechanisms involved in excitation by 5-hydroxytryptamine. *J. exp. Biol.* **179**, 63–75.
- Driedzic, W. R. and Gesser, H.** (1994). Energy metabolism and contractility in ectothermic vertebrate hearts: Hypoxia, acidosis, and low temperature. *Physiol. Rev.* **74**, 221–258.
- Elekes, K., Kiss, T. and S.-Rozsa, K.** (1973). Effect of Ca-free medium on the ultrastructure and excitability of the myocardial cells of the snail, *Helix pomatia* L. *J. Mol. Cell. Cardiol.* **5**, 133–138.
- Ellington, W. R.** (1993). Studies of intracellular pH regulation in cardiac myocytes from the marine bivalve mollusk, *Mercenaria campechiensis*. *Biol. Bull.* **184**, 209–215.
- Gesser, H. and Poupa O.** (1979). Effects of different types of acidosis and  $\text{Ca}^{2+}$  on cardiac contractility in the flounder (*Pleuronectes flesus*) *J. Comp. Physiol.* **131**, 293–296.
- Iijima, T. and Hagiwara, S.** (1986). Effects of the external pH on Ca channels: experimental and theoretical consideration using a two-site, two-ion model. *Proc. Natl. Acad. Sci. USA* **83**, 654–658.
- Ishii, N., Simpson, A. W. M. and Ashley, C. C.** (1989). Effects of 5-hydroxytryptamine (serotonin) and forskolin on intracellular free calcium in isolated and fura-2 loaded smooth-muscle cells from the anterior byssus retractor (catch) muscle of *Mytilus edulis*. *Pflugers Arch.* **414**, 162–170.
- Kinsey, S. T. and Ellington, W. R.** (1995). Interspecific comparisons of capacity for regulation of intracellular pH in molluscan muscle. *Physiol. Zool.* **68**, 26–42.
- Kiss, T. and S.-Rozsa, K.** (1973). The role of mono- and divalent cations in the spike generation of myocardial cations in the snail, *Helix pomatia* L. *Comp. Biochem. Physiol.* **44A**, 173–181.
- Klockner, U. and Isenberg, G.** (1994). Calcium channel current and vascular smooth muscle cells: extracellular protons modulate gating and single channel conductance. *J. Gen. Physiol.* **103**, 665–678.
- Krafte, D. S. and Kass, S. R.** (1988). Hydrogen ion modulation of Ca channel current in cardiac ventricular cells. Evidence for multiple mechanisms. *J. Gen. Physiol.* **91**, 641–657.
- Lagerstrand, G. and Poupa, O.** (1980). Effects of calcium and pH on the mechanical performance of heart muscle in the frog, *Rana temporaria*, during anoxia and subsequent recovery. *Acta Physiol. Scand.* **108**, 399–404.
- Langer, G. A.** (1985). The effect of pH on cellular and membrane calcium binding and contraction of myocardium: a possible role of sarcolemmal phospholipid in EC coupling. *Circ. Res.* **57**, 374–382.
- Langer, G. A., Rich, T. L. and Ji, S.** (1989). Contractile shortening response of ventricular cells to extracellular acidosis. Evidence for two-site control of  $\text{H}^+$ - $\text{Ca}^{2+}$  interaction. *Circ. Res.* **57**, 374–382.
- Ohmori, H. and Yoshii, M.** (1977). Surface potential reflected in both gating and permeation mechanisms of sodium and calcium channels of the tunicate egg cell membrane. *J. Physiol. (Lond.)* **267**, 429–463.
- Orchard, H. C. and Kentish, J. C.** (1990). Effects of changes of pH on the contractile function of cardiac muscle. *Am. J. Physiol.* **258**, C967–C981.
- Paul, D. H.** (1961). Effects of calcium on the spontaneous contractions of the isolated ventricle of the snail, *Helix pomatia*. *Experientia* **17**, 310–312.
- Pedler, S., Fuery, J. C., Withers, C. P., Flanigan, J. and Guppy, M.** (1996). Effectors of metabolic depression in an estivating culminate snail (*Helix aspersa*): whole animal and in vitro tissue studies. *J. Comp. Physiol. B* **166**, 374–381.
- Philipson, K. D., Bers, D. M., Nishimoto, A. Y. and Langer, G. A.** (1980). Binding of  $\text{Ca}^{2+}$  and  $\text{Na}^+$  to sarcolemmal membranes: relation to control of myocardial contractility. *Am. J. Physiol.* **238** H373:H378.
- Pörtner, H. O., Boutilier, R. G., Tang, Y. and Toews, D. P.** (1990). Determination of intracellular pH and  $\text{pCO}_2$  after metabolic inhibition by fluoride and nitrilotriacetic acid. *Resp. Physiol.* **81**, 255–274.
- Rees, B. B. and Hand, S. C.** (1990). Heat dissipation, gas exchange and acid-base status in the land snail *Oreohelix* during short-term estivation. *J. exp. Biol.* **152**, 77–92.



- Rees, B. B., Malhotra, D., Shapiro, J. I. and Hand, S. C.** (1991). Intracellular pH decreases during entry into estivation in the land snail *Oreohelix strigosa*. *J. exp. Biol.* **159**, 525–530.
- Rofalikou, E., Pappa-Louisi, A. and Michaelidis, B.** (1999). Effects of estivation on the levels of biogenic amines and related compounds in the ganglia, the auricle, and the ventricle of the heart of the pulmonate land snail *Helix lucorum* (L.): evidence for physiological roles of serotonin and dopamine in the control of heart function during estivation. *J. exp. Zool.* **283**, 137–146.
- Thomas, R. C.** (1977). The role of bicarbonate, chloride and sodium ion in the regulation of intracellular pH in snail neurones. *J. Physiol., Lond.* **273**, 317–338.
- Wernham, S. and Lukowiak, K.** (1983). The effect of serotonin, dopamine and arginine vasotocin on the isolated *Aplysia* heart. I. Heart rate and amplitude of contraction. *Comp. Biochem. Physiol.* **75C**, 295–303.
- Wieser, W.** (1981). Responses of *Helix pomatia* to anoxia: changes of solute activity and other properties of the haemolymph. *J. Comp. Physiol. B* **141**, 503–509.
- Williamson, J. R., Safer, B., Rich, T., Schaffer, S. and Kobayashi, K.** (1976). Effects of acidosis on myocardial contractility and metabolism. *Acta Med. Scand. (Suppl.)* **587**, 95–112.
- Yee, H. F. Jr. and Jackson, D. C.** (1984). The effects of different types of acidosis and extracellular calcium on the mechanical activity of turtle atria. *J. Comp. Physiol. B* **154**, 385–391.
- Zange, J., Grieshaber, K. M. and Jans, H. W.** (1990). The regulation of intracellular pH estimated by <sup>31</sup>P-NMR spectroscopy in the anterior byssus retractor muscle of *Mytilus edulis* L. *J. exp. Biol.* **150**, 95–109.
